# Supplementary material
Source: PubMed Central journal article supplement (PMC7549358)
Supplement: JB.00401-20-s0001.pdf [file JB.00401-20-s0001.pdf]

**Supplemental material for:**

**Functions of the BamBCDE lipoproteins revealed by bypass mutations in BamA**

Elizabeth M. Hart<sup>1</sup> and Thomas J. Silhavy<sup>1\*</sup>

\* Correspondence to: Thomas J. Silhavy, [tsilhavy@princeton.edu](mailto:tsilhavy@princeton.edu)

**Table S1:** Linkage disruption analysis with *bamB::kan xyz::cam*\*

| Strain                                                                     | Linkage frequency (%)<br><i>bamB::kan xyz::cam</i> | Standard deviation |
|----------------------------------------------------------------------------|----------------------------------------------------|--------------------|
| MC4100                                                                     | 45%                                                | 9.2%               |
| $\Delta bamC\Delta bamE$ Tn7att:: <i>bamA</i>                              | 0%                                                 | 0%                 |
| $\Delta bamC\Delta bamE$ Tn7att:: <i>bamA</i> <sub>E470K</sub>             | 12.7%                                              | 4%                 |
| $\Delta bamC\Delta bamE$ Tn7att:: <i>bamA</i> <sub>A496P</sub>             | 0%                                                 | 0%                 |
| $\Delta bamC\Delta bamE$ Tn7att:: <i>bamA</i> <sub>A499S</sub>             | 0%                                                 | 0%                 |
| $\Delta bamC\Delta bamE \Delta rcsF$ Tn7att:: <i>bamA</i>                  | 0%                                                 | 0%                 |
| $\Delta bamC\Delta bamE \Delta rcsF$ Tn7att:: <i>bamA</i> <sub>E470K</sub> | 13.7%                                              | 7.1%               |
| $\Delta bamC\Delta bamE \Delta rcsF$ Tn7att:: <i>bamA</i> <sub>A496P</sub> | 10.9%                                              | 6.3%               |
| $\Delta bamC\Delta bamE \Delta rcsF$ Tn7att:: <i>bamA</i> <sub>499S</sub>  | 4.5%                                               | 3.3%               |

\*P1 phage carrying *bamB::kan xyz::cam* was used to infect the indicated strains. Linkage frequency represents the number of kanamycin resistant transductants over the total chloramphenicol resistant transductants. Transductions were performed in biological triplicate.

**Table S2:** Linkage disruption analysis with *bamD::kan nadB::Tn10*\*

| Strain                                                                                    | Linkage frequency (%)<br><i>bamD::kan nadB::Tn10</i> | Standard deviation |
|-------------------------------------------------------------------------------------------|------------------------------------------------------|--------------------|
| <i>bamD</i> <sup>+</sup> $\lambda_{att}$ P <sub>BAD</sub> <i>bamD</i> (+ara)              | 26.7%                                                | 4.7%               |
| Tn7att:: <i>bamA</i>                                                                      | 0%                                                   | 0%                 |
| Tn7att:: <i>bamA</i> <sub>A496P</sub>                                                     | 14%                                                  | 7.2%               |
| Tn7att:: <i>bamA</i> <sub>A499S</sub>                                                     | 0%                                                   | 0%                 |
| $\Delta$ <i>rcsF</i> Tn7att:: <i>bamA</i>                                                 | 0%                                                   | 0%                 |
| $\Delta$ <i>rcsB</i> Tn7att:: <i>bamA</i>                                                 | 0%                                                   | 0%                 |
| $\Delta$ <i>rcsF</i> Tn7att:: <i>bamA</i> <sub>A496P</sub>                                | 12.3%                                                | 5.5%               |
| $\Delta$ <i>rcsF</i> Tn7att:: <i>bamA</i> <sub>A499S</sub>                                | 17.9%                                                | 1.4%               |
| $\Delta$ <i>rcsB</i> Tn7att:: <i>bamA</i> <sub>A499S</sub>                                | 0%                                                   | 0%                 |
| $\Delta$ <i>bamC bamE::cam</i> Tn7att:: <i>bamA</i>                                       | 0%                                                   | 0%                 |
| $\Delta$ <i>bamC bamE::cam</i> Tn7att:: <i>bamA</i> <sub>E470K</sub>                      | 10%                                                  | 1.7%               |
| $\Delta$ <i>bamC bamE::cam</i> Tn7att:: <i>bamA</i> <sub>A496P</sub>                      | 8.8%                                                 | 2.5%               |
| $\Delta$ <i>bamC bamE::cam</i> Tn7att:: <i>bamA</i> <sub>A499S</sub>                      | 0%                                                   | 0%                 |
| $\Delta$ <i>bamC bamE::cam</i> $\Delta$ <i>rcsF</i> Tn7att:: <i>bamA</i>                  | 0%                                                   | 0%                 |
| $\Delta$ <i>bamC bamE::cam</i> $\Delta$ <i>rcsF</i> Tn7att:: <i>bamA</i> <sub>E470K</sub> | 4.9%                                                 | 3.6%               |
| $\Delta$ <i>bamC bamE::cam</i> $\Delta$ <i>rcsF</i> Tn7att:: <i>bamA</i> <sub>A496P</sub> | 8.8%                                                 | 2.3%               |
| $\Delta$ <i>bamC bamE::cam</i> $\Delta$ <i>rcsF</i> Tn7att:: <i>bamA</i> <sub>A499S</sub> | 14.9%                                                | 2.6%               |

\*Linkage disruption was performed by infecting the indicated strains with P1 phage carrying *bamD::kan nadB::Tn10*. The number of kanamycin resistant colonies over the total number of tetracycline resistant colonies was reported as linkage frequency.

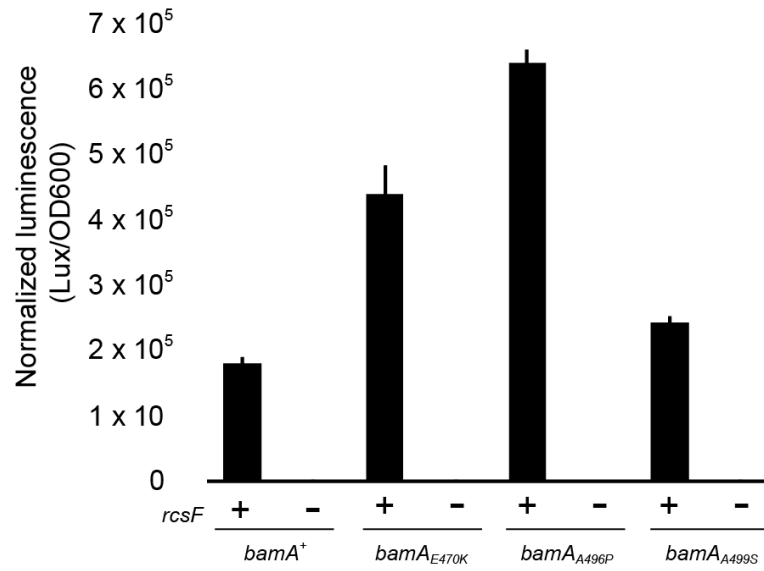

**Figure S1: RcsF/OMP assembly in the *bamA* suppressor alleles as measured  $P_{rprA}$ -lux activity.** The labeled strains carrying pCS26(cam):: $P_{rprA}$ -lux were grown to mid-log at 30°C. Lux activity was normalized by OD600 and data represents the average of three biological replicates with errors bars being SEM.

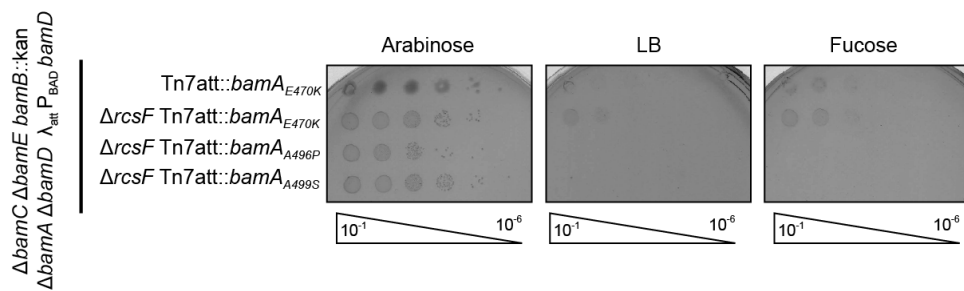

**Figure S2: Testing minimal BAM complexes.**  $\Delta bamB\Delta bamC\Delta bamE$  mutants expressing an arabinose-inducible copy of *bamD* were grown overnight at 30°C in media containing arabinose. Cells were normalized by OD600, serially diluted, and spotted onto media containing arabinose to induce expression of *bamD* or fucose to prevent expression.

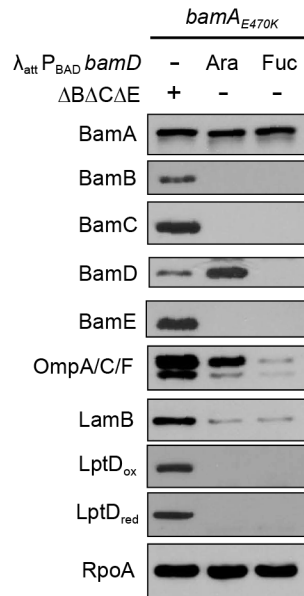

**Figure S3: OMP assembly is impaired in  $\Delta bamB\Delta bamC\Delta bamE$  *bamA<sub>E470K</sub>* BamD-depleted cells.** Immunoblot analysis of BamD-depleted cells from the depletion shown in Figure 4D. Stationary phase samples were electrophoresed and probed for BamABCDE and several OMPs. RpoA served as a loading control.

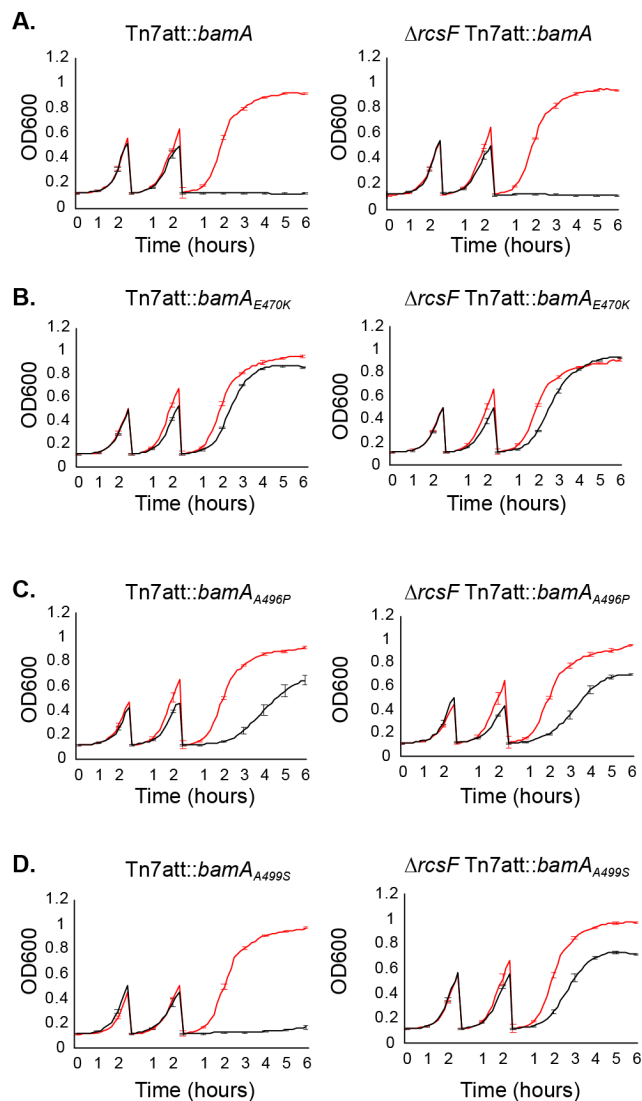

**Figure S4: Cell viability upon liquid depletion of BamD.** (A-D) Cells (+/- *rcsF*) expressing (A) BamA<sup>+</sup>, (B) BamA<sup>E470K</sup>, (C) BamA<sup>A496P</sup>, or (D) BamA<sup>A499S</sup> and carrying an arabinose inducible copy of *bamD* were grown overnight in arabinose. Cells were normalized by OD600 and inoculated into media supplemented with arabinose or fucose. Cultures were grown to and OD600 ~ 0.5 at 37°C and back-diluted into fresh media. The cycling was repeated once more. Depletions were performed at 37°C.

**Table S3: Strains, plasmids, and oligonucleotides used in this study.**

| Strains | Genotype                                                                                                                         | Reference  |
|---------|----------------------------------------------------------------------------------------------------------------------------------|------------|
| MC4100  | F- <i>araD139 (argF-lac)U169 rpsL150 relA1 flb5301 deoC1 ptsF25 thi</i>                                                          | (1)<br>(2) |
| JCM158  | MC4100 <i>ara</i> <sup>r/-</sup>                                                                                                 | (3)        |
| JCM255  | $\lambda_{att}$ P <sub>BAD</sub> :: <i>bamD</i>                                                                                  | (4)        |
| JCM500  | $\Delta$ <i>bamA recA</i> ::kan $\lambda_{att}$ P <sub>BAD</sub> :: <i>bamA</i>                                                  | (4)        |
| BH315   | <i>bamB</i> ::kan <i>xyz</i> ::cam                                                                                               | This study |
| BH1417  | $\Delta$ <i>bamA</i> Tn7att:: <i>bamA</i> FRT                                                                                    | (4)        |
| BH1418  | $\Delta$ <i>bamA</i> Tn7att:: <i>bamA</i> <sub>E470K</sub> FRT                                                                   | (4)        |
| BH1779  | $\Delta$ <i>bamC</i> $\Delta$ <i>bamE</i> $\Delta$ <i>bamA</i><br>Tn7att:: <i>bamA</i> FRT                                       | This study |
| BH1780  | $\Delta$ <i>bamC</i> $\Delta$ <i>bamE</i> $\Delta$ <i>bamA</i><br>Tn7att:: <i>bamA</i> <sub>E470K</sub> FRT                      | This study |
| BH2076  | $\Delta$ <i>bamA</i> Tn7att:: <i>bamA</i> <sub>A496P</sub> FRT                                                                   | This study |
| BH2077  | $\Delta$ <i>bamA</i> Tn7att:: <i>bamA</i> <sub>A499S</sub> FRT                                                                   | This study |
| BH2084  | $\Delta$ <i>bamC</i> $\Delta$ <i>bamE</i> $\Delta$ <i>bamA</i><br>Tn7att:: <i>bamA</i> <sub>A496P</sub> FRT                      | This study |
| BH2093  | $\Delta$ <i>rcsF</i> $\Delta$ <i>bamA</i> Tn7att:: <i>bamA</i> FRT                                                               | This study |
| BH2094  | $\Delta$ <i>rcsF</i> $\Delta$ <i>bamA</i><br>Tn7att:: <i>bamA</i> <sub>E470K</sub> FRT                                           | This study |
| BH2109  | $\Delta$ <i>bamC</i> $\Delta$ <i>bamE</i> $\Delta$ <i>bamA</i><br>Tn7att:: <i>bamA</i> <sub>A499S</sub> FRT                      | This study |
| BH2142  | $\Delta$ <i>rcsF</i> $\Delta$ <i>bamA</i><br>Tn7att:: <i>bamA</i> <sub>A499S</sub> FRT                                           | This study |
| BH2222  | $\Delta$ <i>bamC</i> $\Delta$ <i>bamE</i> $\Delta$ <i>rcsF</i> $\Delta$ <i>bamA</i><br>Tn7att:: <i>bamA</i> FRT                  | This study |
| BH2223  | $\Delta$ <i>bamC</i> $\Delta$ <i>bamE</i> $\Delta$ <i>rcsF</i> $\Delta$ <i>bamA</i><br>Tn7att:: <i>bamA</i> <sub>A499S</sub> FRT | This study |
| BH2259  | $\Delta$ <i>bamC</i> $\Delta$ <i>bamE</i> $\Delta$ <i>rcsF</i> $\Delta$ <i>bamA</i><br>Tn7att:: <i>bamA</i> <sub>A496P</sub> FRT | This study |
| BH2305  | <i>bamD</i> ::kan <i>nadB</i> ::Tn10 $\lambda_{att}$ P <sub>BAD</sub><br><i>bamD</i>                                             | (5)        |
| BH2308  | $\Delta$ <i>bamA</i> Tn7att:: <i>bamA</i> <sub>E470K</sub> FRT<br><i>bamD</i> ::kan                                              | (5)        |
| BH2312  | $\Delta$ <i>bamA</i> Tn7att:: <i>bamA</i> <sub>A496P</sub> FRT<br><i>bamD</i> ::kan                                              | This study |
| BH2316  | $\Delta$ <i>rcsF</i> $\Delta$ <i>bamA</i><br>Tn7att:: <i>bamA</i> <sub>A499S</sub> FRT <i>bamD</i> ::kan                         | This study |
| BH2320  | $\Delta$ <i>bamC</i> $\Delta$ <i>bamE</i> $\Delta$ <i>bamA</i><br>Tn7att:: <i>bamA</i> <sub>E470K</sub> FRT <i>bamB</i> ::kan    | This study |



|        |                                                                                                                                                         |            |
|--------|---------------------------------------------------------------------------------------------------------------------------------------------------------|------------|
| BH2323 | $\Delta bamC \Delta bamE \Delta rcsF \Delta bamA$<br>Tn7att:: <i>bamA</i> <sub>A496P</sub> FRT <i>bamB</i> ::kan                                        | This study |
| BH2327 | $\Delta bamC \Delta bamE \Delta rcsF \Delta bamA$<br>Tn7att:: <i>bamA</i> <sub>A499S</sub> FRT <i>bamB</i> ::kan                                        | This study |
| BH2339 | $\Delta rcsF \Delta bamA$<br>Tn7att:: <i>bamA</i> <sub>E470K</sub> FRT <i>bamD</i> ::kan                                                                | (5)        |
| BH2342 | $\Delta bamC \Delta bamE \Delta rcsF \Delta bamA$<br>Tn7att:: <i>bamA</i> <sub>E470K</sub> FRT <i>bamB</i> ::kan                                        | This study |
| BH2366 | $\Delta bamA \Delta bamD$ Tn7att:: <i>bamA</i> FRT<br>$\lambda_{att}$ P <sub>BAD</sub> :: <i>bamD</i>                                                   | This study |
| BH2368 | $\Delta bamA \Delta bamD$<br>Tn7att:: <i>bamA</i> <sub>E470K</sub> FRT $\lambda_{att}$<br>P <sub>BAD</sub> :: <i>bamD</i>                               | This study |
| BH2369 | $\Delta rcsF \Delta bamA \Delta bamD$<br>Tn7att:: <i>bamA</i> <sub>E470K</sub> FRT $\lambda_{att}$<br>P <sub>BAD</sub> :: <i>bamD</i>                   | This study |
| BH2370 | $\Delta bamA \Delta bamD$<br>Tn7att:: <i>bamA</i> <sub>A496P</sub> FRT $\lambda_{att}$<br>P <sub>BAD</sub> :: <i>bamD</i>                               | This study |
| BH2372 | $\Delta bamA \Delta bamD$<br>Tn7att:: <i>bamA</i> <sub>A499S</sub> FRT $\lambda_{att}$<br>P <sub>BAD</sub> :: <i>bamD</i>                               | This study |
| BH2373 | $\Delta rcsF \Delta bamA \Delta bamD$<br>Tn7att:: <i>bamA</i> <sub>A499S</sub> FRT $\lambda_{att}$<br>P <sub>BAD</sub> :: <i>bamD</i>                   | This study |
| BH2410 | $\Delta bamA \Delta bamD$ Tn7att:: <i>bamA</i> FRT<br><i>bamB</i> ::kan $\lambda_{att}$ P <sub>BAD</sub> :: <i>bamD</i>                                 | This study |
| BH2412 | $\Delta rcsF \Delta bamA \Delta bamD$<br>Tn7att:: <i>bamA</i> <sub>E470K</sub> FRT <i>bamB</i> ::kan<br>$\lambda_{att}$ P <sub>BAD</sub> :: <i>bamD</i> | This study |
| BH2413 | $\Delta bamA \Delta bamD$<br>Tn7att:: <i>bamA</i> <sub>E470K</sub> FRT <i>bamB</i> ::kan<br>$\lambda_{att}$ P <sub>BAD</sub> :: <i>bamD</i>             | This study |
| BH2414 | $\Delta bamA \Delta bamD$<br>Tn7att:: <i>bamA</i> <sub>A496P</sub> FRT <i>bamB</i> ::kan<br>$\lambda_{att}$ P <sub>BAD</sub> :: <i>bamD</i>             | This study |
| BH2416 | $\Delta bamA \Delta bamD$<br>Tn7att:: <i>bamA</i> <sub>A499S</sub> FRT <i>bamB</i> ::kan<br>$\lambda_{att}$ P <sub>BAD</sub> :: <i>bamD</i>             | This study |
| BH2417 | $\Delta rcsF \Delta bamA \Delta bamD$<br>Tn7att:: <i>bamA</i> <sub>A499S</sub> FRT <i>bamB</i> ::kan<br>$\lambda_{att}$ P <sub>BAD</sub> :: <i>bamD</i> | This study |
| BH2435 | $\Delta rcsB \Delta bamA$<br>Tn7att:: <i>bamA</i> <sub>A499S</sub> FRT                                                                                  | This study |

|        |                                                                                                                                                                 |            |
|--------|-----------------------------------------------------------------------------------------------------------------------------------------------------------------|------------|
| BH2488 | <i>ΔbamC ΔbamE ΔrcsF ΔbamA</i><br>Tn7att:: <i>bamA<sub>E470K</sub>FRT</i>                                                                                       | This study |
| BH2500 | <i>ΔbamC ΔbamE ΔrcsF ΔbamA</i><br><i>ΔbamD</i> Tn7att:: <i>bamA<sub>E470K</sub>FRT λ<sub>att</sub></i><br>P <sub>BAD</sub> :: <i>bamD bamB</i> ::kan            | This study |
| BH2513 | <i>ΔbamC ΔbamE ΔrcsF ΔbamA</i><br><i>ΔbamD</i> Tn7att:: <i>bamA<sub>A499S</sub>FRT λ<sub>att</sub></i><br>P <sub>BAD</sub> :: <i>bamD bamB</i> ::kan            | This study |
| BH2514 | <i>ΔrcsF ΔbamA ΔbamD</i><br>Tn7att:: <i>bamA</i> FRT λ <sub>att</sub> P <sub>BAD</sub> :: <i>bamD</i>                                                           | This study |
| BH2515 | <i>ΔrcsF ΔbamA ΔbamD</i><br>Tn7att:: <i>bamA<sub>A496P</sub>FRT λ<sub>att</sub></i><br>P <sub>BAD</sub> :: <i>bamD</i>                                          | This study |
| BH2518 | <i>ΔrcsF ΔbamA</i><br>Tn7att:: <i>bamA<sub>A496P</sub>FRT</i>                                                                                                   | This study |
| BH2527 | <i>ΔrcsF ΔbamA ΔbamD bamB</i> ::kan<br>Tn7att:: <i>bamA</i> FRT λ <sub>att</sub> P <sub>BAD</sub> :: <i>bamD</i>                                                | This study |
| BH2534 | <i>ΔrcsF ΔbamA</i><br>Tn7att:: <i>bamA<sub>A496P</sub>FRT bamD</i> ::kan                                                                                        | This study |
| BH2543 | <i>ΔbamC ΔbamE ΔbamA ΔbamD</i><br>Tn7att:: <i>bamA<sub>E470K</sub>FRT λ<sub>att</sub></i><br>P <sub>BAD</sub> :: <i>bamD bamB</i> ::kan                         | This study |
| BH2546 | <i>ΔbamC ΔbamE ΔrcsF ΔbamA</i><br><i>ΔbamD</i> Tn7att:: <i>bamA<sub>A496P</sub>FRT λ<sub>att</sub></i><br>P <sub>BAD</sub> :: <i>bamD bamB</i> ::kan            | This study |
| BH2556 | <i>ΔbamC ΔbamE ΔbamA ΔbamD</i><br>Tn7att:: <i>bamA<sub>E470K</sub>FRT λ<sub>att</sub></i><br>P <sub>BAD</sub> :: <i>bamD bamB</i> ::kan (depleted in<br>fucose) | This study |
| BH2559 | <i>ΔbamC ΔbamE ΔbamA</i><br>Tn7att:: <i>bamA<sub>E470K</sub>FRT bamD</i> ::kan                                                                                  | This study |
| BH2560 | <i>ΔbamC ΔbamE ΔrcsF ΔbamA</i><br>Tn7att:: <i>bamA<sub>E470K</sub>FRT bamD</i> ::kan                                                                            | This study |
| BH2572 | <i>ΔbamC ΔbamE ΔbamA</i><br>Tn7att:: <i>bamA<sub>A496P</sub>FRT bamD</i> ::kan                                                                                  | This study |
| BH2573 | <i>ΔbamC ΔbamE ΔrcsF ΔbamA</i><br>Tn7att:: <i>bamA<sub>A496P</sub>FRT bamD</i> ::kan                                                                            | This study |
| BH2574 | <i>ΔbamC ΔbamE ΔrcsF ΔbamA</i><br>Tn7att:: <i>bamA<sub>A499S</sub>FRT bamD</i> ::kan                                                                            | This study |
| BH2588 | <i>ΔbamC ΔbamA</i> Tn7att:: <i>bamA</i> FRT<br><i>bamE</i> ::cam                                                                                                | This study |
| BH2589 | <i>ΔbamC ΔbamA</i><br>Tn7att:: <i>bamA<sub>E470K</sub>FRT bamE</i> ::cam                                                                                        | This study |

| BH2592                                       | $\Delta bamC \Delta rcsF \Delta bamA$<br>Tn7att:: <i>bamA</i> <sub>E470K</sub> FRT <i>bamE</i> ::cam                                                                                                         | This study    |
|----------------------------------------------|--------------------------------------------------------------------------------------------------------------------------------------------------------------------------------------------------------------|---------------|
| BH2593                                       | $\Delta bamC \Delta bamA$<br>Tn7att:: <i>bamA</i> <sub>A496P</sub> FRT <i>bamE</i> ::cam                                                                                                                     | This study    |
| BH2600                                       | $\Delta bamC \Delta rcsF \Delta bamA$<br>Tn7att:: <i>bamA</i> FRT <i>bamE</i> ::cam                                                                                                                          | This study    |
| BH2601                                       | $\Delta bamC \Delta bamA$<br>Tn7att:: <i>bamA</i> <sub>A499S</sub> FRT <i>bamE</i> ::cam                                                                                                                     | This study    |
| BH2649                                       | $\Delta bamC \Delta rcsF \Delta bamA$<br>Tn7att:: <i>bamA</i> <sub>A496P</sub> FRT <i>bamE</i> ::cam                                                                                                         | This study    |
| BH2650                                       | $\Delta bamC \Delta rcsF \Delta bamA$<br>Tn7att:: <i>bamA</i> <sub>A499S</sub> FRT <i>bamE</i> ::cam                                                                                                         | This study    |
| BH2666                                       | $\Delta bamA$ Tn7att:: <i>bamA</i> FRT<br>pCS26(cam):: <i>P<sub>rprA</sub>-lux</i>                                                                                                                           | This study    |
| BH2667                                       | $\Delta rcsF \Delta bamA$ Tn7att:: <i>bamA</i> FRT<br>pCS26(cam):: <i>P<sub>rprA</sub>-lux</i>                                                                                                               | This study    |
| BH2669                                       | $\Delta bamA$ Tn7att:: <i>bamA</i> <sub>E470K</sub> FRT<br>pCS26(cam):: <i>P<sub>rprA</sub>-lux</i>                                                                                                          | This study    |
| BH2668                                       | $\Delta rcsF \Delta bamA$<br>Tn7att:: <i>bamA</i> <sub>E470K</sub> FRT<br>pCS26(cam):: <i>P<sub>rprA</sub>-lux</i>                                                                                           | This study    |
| BH2677                                       | $\Delta bamA$ Tn7att:: <i>bamA</i> <sub>A496P</sub> FRT<br>pCS26(cam):: <i>P<sub>rprA</sub>-lux</i>                                                                                                          | This study    |
| BH2678                                       | $\Delta rcsF \Delta bamA$<br>Tn7att:: <i>bamA</i> <sub>A496P</sub> FRT<br>pCS26(cam):: <i>P<sub>rprA</sub>-lux</i>                                                                                           | This study    |
| BH2680                                       | $\Delta bamA$ Tn7att:: <i>bamA</i> <sub>A499S</sub> FRT<br>pCS26(cam):: <i>P<sub>rprA</sub>-lux</i>                                                                                                          | This study    |
| BH2681                                       | $\Delta rcsF \Delta bamA$<br>Tn7att:: <i>bamA</i> <sub>A499S</sub> FRT<br>pCS26(cam):: <i>P<sub>rprA</sub>-lux</i>                                                                                           | This study    |
| BH2695                                       | $\Delta rcsF \Delta bamA \Delta bamD$<br>Tn7att:: <i>bamA</i> <sub>A496P</sub> FRT <i>bamB</i> ::kan<br>$\lambda_{att}$ P <sub>BAD</sub> :: <i>bamD</i>                                                      | This study    |
| Plasmids                                     | Relevant features                                                                                                                                                                                            | Reference     |
| pGRG25Modular:: <i>bamA</i>                  | <i>bamA</i> under control of the native promoter (defined as 1000bp upstream of ATG) for insertion at Tn7 attachment site. Kanamycin resistance cassette is located downstream and flanked by FRT sequences. | (4, 6)<br>(5) |
| pGRG25Modular:: <i>bamA</i> <sub>A496P</sub> | <i>bamA</i> <sub>A496P</sub> on plasmid for Tn7 attachment site integration                                                                                                                                  | This study    |

| pGRG25Modular:: <i>bamA</i> <sub>A499S</sub> | <i>bamA</i> <sub>A499S</sub> on plasmid for Tn7 attachment site integration | This study                                                                                    |
|----------------------------------------------|-----------------------------------------------------------------------------|-----------------------------------------------------------------------------------------------|
| Oligonucleotides                             | Sequence (5' → 3')                                                          | Information                                                                                   |
| BH102-bamC-Fwd                               | GCGTCTGATGCCATTAC<br>ACAAC                                                  | To amplify chromosomal <i>bamC</i>                                                            |
| BH103-bamC-Rev                               | CTTTTGCTGTCTGGTGTG<br>CC                                                    |                                                                                               |
| BH310                                        | ATGGCGATGAAAAAG<br>TTG                                                      | To amplify <i>bamA</i> alleles from pZS21 plasmid for Gibson into pGRG25Modular:: <i>bamA</i> |
| BH311                                        | ATAGGAACTTCAAAA<br>GGGCCTTACCAGGTTT<br>TACCGATG                             |                                                                                               |

## References

1. **Silhavy TJ, Berman ML, Enquist LW.** Experiments with Gene Fusions. Cold Spring Harbor Laboratory.
2. **Boyd D, Weiss DS, Chen JC, Beckwith J.** 2000. Towards Single-Copy Gene Expression Systems Making Gene Cloning Physiologically Relevant: Lambda InCh, a Simple *Escherichia coli* Plasmid-Chromosome Shuttle System. *Journal of Bacteriology* **182**:842–847.
3. **Malinverni JC, Werner J, Kim S, Sklar JG, Kahne D, Misra R, Silhavy TJ.** 2006. YfiO stabilizes the YaeT complex and is essential for outer membrane protein assembly in *Escherichia coli*. *Mol Microbiol* **61**:151–164.
4. **Hart EM, Mitchell AM, Konovalova A, Grabowicz M, Sheng J, Han X, Rodriguez-Rivera FP, Schwaid AG, Malinverni JC, Balibar CJ, Bodea S, Si Q, Wang H, Homsher MF, Painter RE, Ogawa AK, Sutterlin H, Roemer T, Black TA, Rothman DM, Walker SS, Silhavy TJ.** 2019. A small-molecule inhibitor of BamA impervious to efflux and the outer membrane permeability barrier. *Proc Natl Acad Sci USA* **116**:21748–21757.
5. **Hart EM, Gupta M, Wühr M, Silhavy TJ.** 2020. The gain-of-function allele *bamA*<sub>E470K</sub> bypasses the essential requirement for BamD in  $\beta$ -barrel outer membrane protein assembly. *Proc Natl Acad Sci USA* **117**:18737–18743.
6. **Hart EM, Gupta M, Wühr M, Silhavy TJ.** 2019. The Synthetic Phenotype of  $\Delta$ *bamB* $\Delta$ *bamE* Double Mutants Results from a Lethal Jamming of the Bam Complex by the Lipoprotein RcsF. *mBio* **10**:189–12.
